# Supplementary material for: Water-dispersible astaxanthin-rich nanopowder: preparation, oral safety and antioxidant activity in vivo
Source: Royal Society of Chemistry journal article supplement (doi:10.1039/c8fo01593g), 2019-01-01
Supplement: c8fo01593g1.pdf [file c8fo01593g1.pdf]

## Supplemental Data

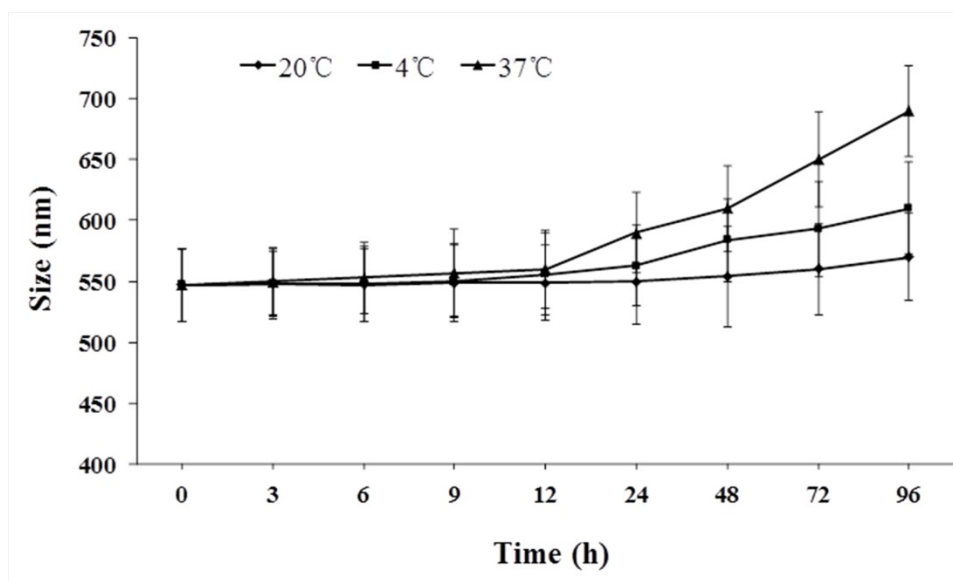

Fig. S1 Stability of Ast/DC resuspension at different temperatures (20°C, 4°C and 37°C).

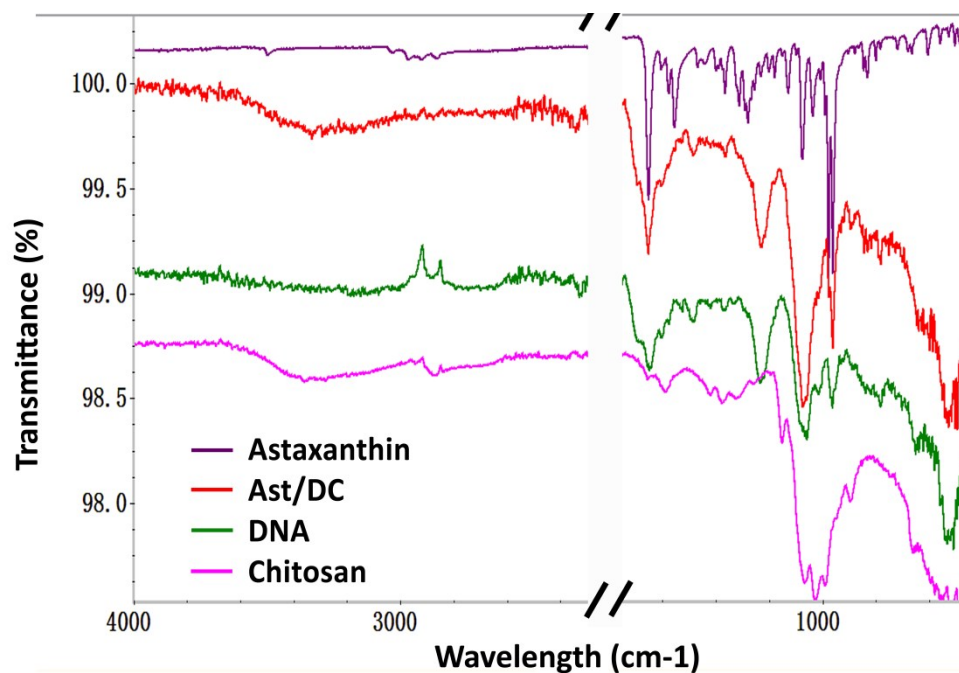

Fig. S2 FT-IR spectra of astaxanthin, Ast/DC, DNA and Chitosan in the region 600-4000 cm<sup>-1</sup>.

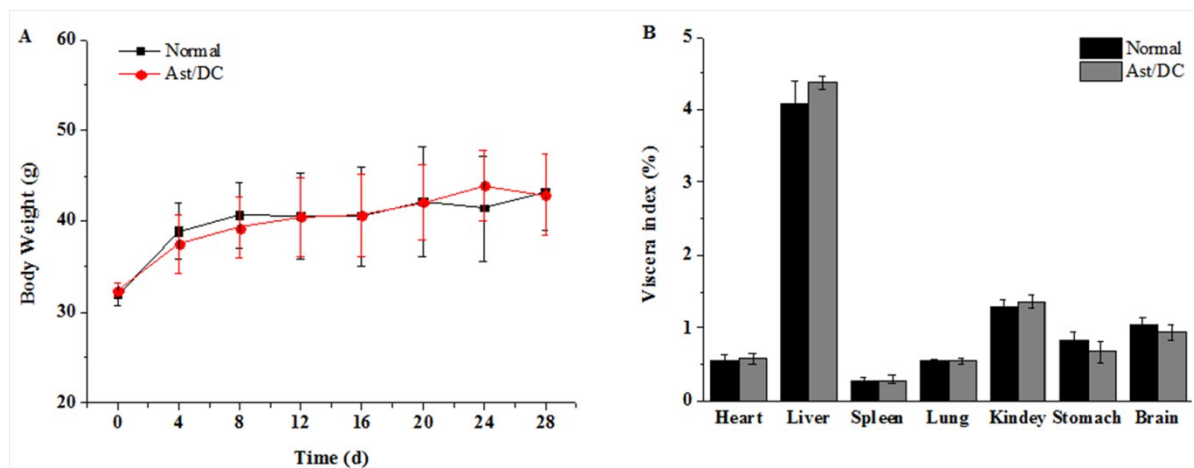

**Fig. S3** Body weight (A) and viscera index (B) of the mice administrated with water (normal) and Ast/DC nanoparticles, respectively.

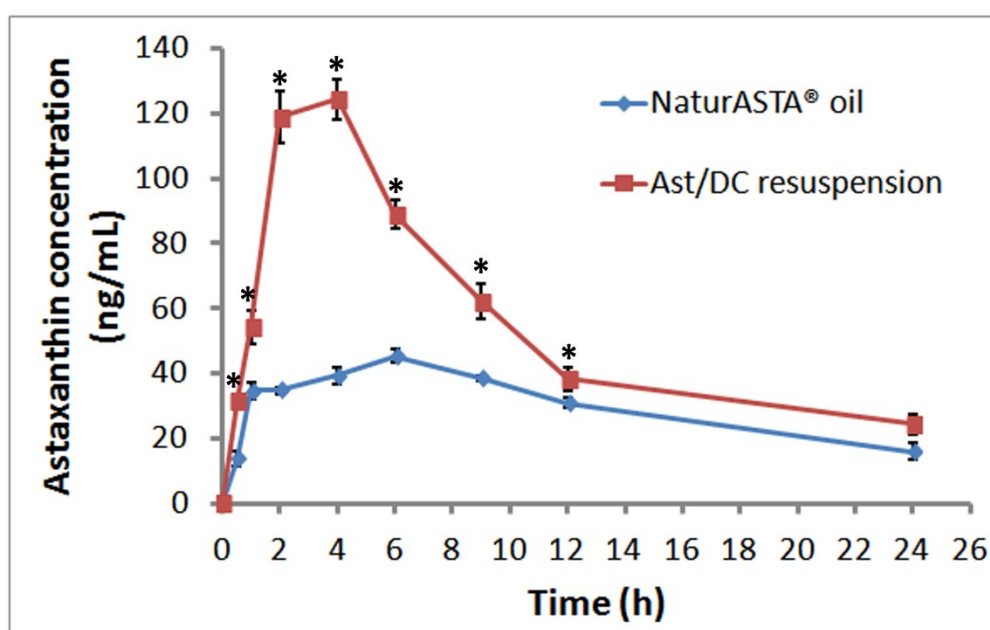

**Fig. S4** Plasma astaxanthin concentration vs. time profiles after oral administration of astaxanthin oil and Ast/DC nanoparticles. Asterisks (\*) denote the statistical significance compared with the NaturASTA® oil group, \* $P < 0.01$  ( $n=3$ )

**Table S1.** Element contents (%) of Ast/DC and DNA based on XPS analysis

| Sample | Atom percentage (%) |       |       |      |
|--------|---------------------|-------|-------|------|
|        | C                   | O     | N     | P    |
| Ast/DC | 62.7                | 28.2  | 8.04  | 1.06 |
| DNA    | 51.32               | 28.77 | 15.34 | 4.57 |
